# Supplementary material for: Rational design of a bifunctional catalyst utilizing Mn-containing layered double oxide for the highly efficient oxidative cleavage of 1,2-diols
Source: Royal Society of Chemistry journal article supplement (doi:10.1039/d4cy00740a), 2024-01-01
Supplement: d4cy00740a1.pdf [file d4cy00740a1.pdf]

# Rational design of bifunctional catalyst based on Mn-containing layered double oxide for the efficient oxidative cleavage of 1,2-diols

Xuan Dai, Pengfei Chen, Xin Wang, Junfeng Qian, Weiyu Zhou\*, Mingyang He\*

Jiangsu Key Laboratory of Advanced Catalytic Materials and Technology, Changzhou University,  
213164 Changzhou, China

## Table of content

### Characterization of catalysts.

#### Typical procedure for Knoevenagel condensation between benzaldehyde and ethyl cyanoacetate.

**Fig. S1a.** SEM image of Ni<sub>2</sub>Mg<sub>2</sub>Mn-LDH.

**Fig. S1b.** SEM images of Ni<sub>2</sub>Mg<sub>2</sub>Mn-LDO (250).

**Fig. S1c.** SEM images of Ni<sub>2</sub>Mg<sub>2</sub>Mn-LDO (350).

**Fig. S1d.** SEM images of Ni<sub>2</sub>Mg<sub>2</sub>Mn-LDO (450).

**Fig. S2.** TG thermogram of Ni<sub>2</sub>Mg<sub>2</sub>Mn-LDH, Ni<sub>2</sub>Mg<sub>2</sub>Mn-LDO (250), Ni<sub>2</sub>Mg<sub>2</sub>Mn-LDO (350) and Ni<sub>2</sub>Mg<sub>2</sub>Mn-LDO (450).

**Fig. S3.** FT-IR spectra of Ni<sub>2</sub>Mg<sub>2</sub>Mn-LDH, Ni<sub>2</sub>Mg<sub>2</sub>Mn-LDO (250), Ni<sub>2</sub>Mg<sub>2</sub>Mn-LDO (350) and Ni<sub>2</sub>Mg<sub>2</sub>Mn-LDO (450).

**Fig. S4a.** N<sub>2</sub> adsorption / desorption isotherms of Ni<sub>2</sub>Mg<sub>2</sub>Mn-LDH.

**Fig. S4b.** N<sub>2</sub> adsorption / desorption isotherms of Ni<sub>2</sub>Mg<sub>2</sub>Mn-LDO (250).

**Fig. S4c.** N<sub>2</sub> adsorption / desorption isotherms of Ni<sub>2</sub>Mg<sub>2</sub>Mn-LDO (350).

**Fig. S4d.** N<sub>2</sub> adsorption / desorption isotherms of Ni<sub>2</sub>Mg<sub>2</sub>Mn-LDO (450).

**Table S1.** Physico-chemical properties of Ni<sub>2</sub>Mg<sub>2</sub>Mn-LDH, Ni<sub>2</sub>Mg<sub>2</sub>Mn-LDO (250), Ni<sub>2</sub>Mg<sub>2</sub>Mn-LDO (350) and Ni<sub>2</sub>Mg<sub>2</sub>Mn-LDO (450).

**Fig. S5a.** XPS diffraction patterns of Ni<sub>2</sub>Mg<sub>2</sub>Mn-LDO (250)

**Fig. S5b.** XPS diffraction patterns of Ni<sub>2</sub>Mg<sub>2</sub>Mn-LDO (450)

**Fig. S5c.** XPS diffraction patterns of prepared catalysts.

**Table S2.** Optimization of Reaction Conditions.

**Fig. S6.** Effect of reaction temperature and time.

**Scheme S1**

**Scheme S2.** Hypotheses regarding the mechanism involving cyclic intermediates.

**Scheme S3.** Hypothesis regarding the mechanism of single-electron transfer.

### **Kinetic experiments**

**Fig. S7.** The effect of rotational speed on the conversion of the oxidative decomposition of hydrogen amines.

**Fig. S8.** The hot-filtration experiment.

**Fig. S9a.** The recycled results of Ni<sub>2</sub>Mg<sub>2</sub>Mn-LDO(350) catalyst.

**Fig. S9b.** XPS diffraction patterns of recycled Ni<sub>2</sub>Mg<sub>2</sub>Mn-LDO(350)

### **Analytical Data**

#### **NMR Spectra**

#### **Reference**

### **Characterization of catalysts.**

The crystalline phases of the prepared materials were identified by X-ray diffraction (XRD) on a Rigaku powered diffraction unit with Cu K $\alpha$  radiation ( $\lambda=1.5402$  Å, 40 kV, 300 mA). Scanning electron micrograph (SEM) was performed on a ZEISS/SUPRA55 instrument. FTIR spectra of the prepared catalyst were collected on a Nicolet PROTÉGÉ 460 FTIR spectrometer using KBr disks. The inductively coupled plasma-atomic emission spectroscopy (ICP-AES) were carried out for quantitative analysis of metal elements using an Agilent ICPMS 7700. The N<sub>2</sub> adsorption–desorption isotherms were measured on a Micromeritics ASAP2460 at 77 K, and then the specific surface area was calculated by the Brunauer-Emmett-Teller (BET) method using the adsorption data in the relative pressure range from 0.05 to 0.30. The pore size distribution curves were calculated from analysis of the adsorption branch of the isotherm using the Barrett-Joyner-Halenda (BJH) method. Thermogravimetric analysis of samples are completed on ZRY-2P TG-DTG under the air atmosphere, the test temperature was 40–800 °C, and the heating rate was 10 °/min. X-ray photoelectron spectroscopy (XPS) patterns was achieved using a Thermo Scientific K-Alpha with a monochromatic Al X-ray source (excitation energy 1486.6 eV). The C 1s peak at 284.80 eV was used as calibration.

**Typical procedure for Knoevenagel condensation between benzaldehyde and ethyl cyanoacetate.**

Catalyst 10 mg, benzaldehyde (1 mmol), ethyl cyanoacetate (1 mmol) and DMF (3 mL) were added to a reaction tube, and the mixture was vigorously stirred at 35 °C under air. After the reaction, the reaction mixture was filtrated and 40 mg of nitrobenzene was added to the reaction solution. The products were analyzed using GC equipped with a FID detector and CP-Sil5 capillary column (length 50 m, i.d. 0.25 mm, film thickness 0.25  $\mu\text{m}$ ). Conversion and yield of products were determined based on benzaldehyde by GC using nitrobenzene as an internal standard. Products were also identified using standard compounds and GC-MS equipped with the same detector and capillary column.

SEM images (Fig. S1) indicate that the crystallinity of  $\text{Ni}_2\text{Mg}_2\text{Mn-LDO}$  increased and the flake structure disappeared after calcination.

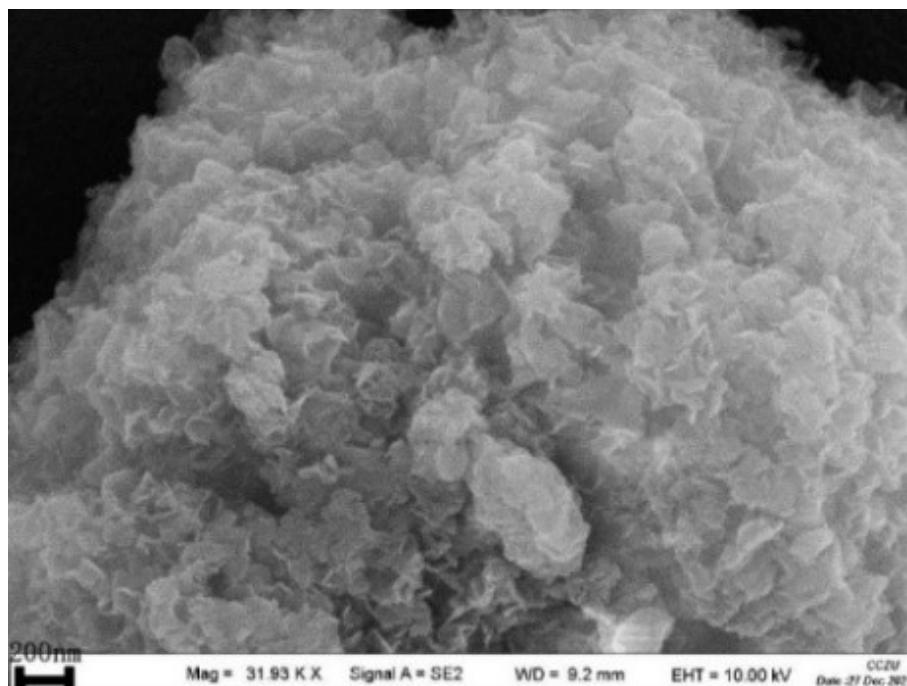

**Fig. S1a.** SEM image of  $\text{Ni}_2\text{Mg}_2\text{Mn-LDH}$ .

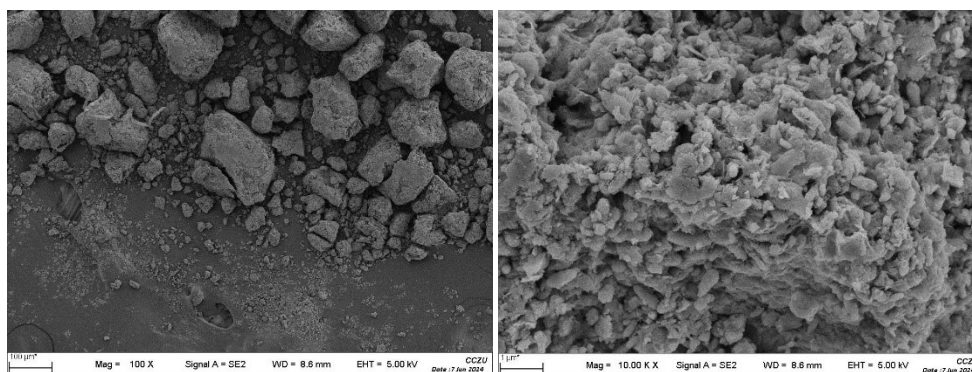

**Fig. S1b.** SEM images of  $\text{Ni}_2\text{Mg}_2\text{Mn-LDO}$  (250).

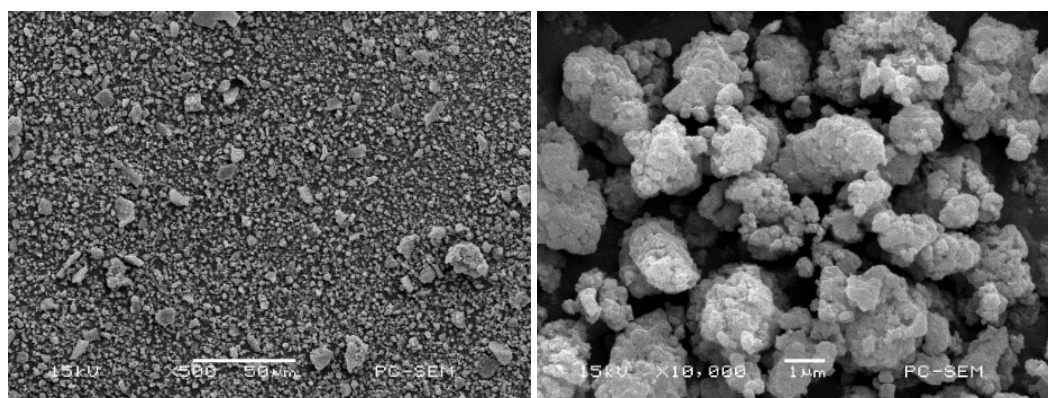

**Fig. S1c.** SEM images of  $\text{Ni}_2\text{Mg}_2\text{Mn-LDO}$  (350).

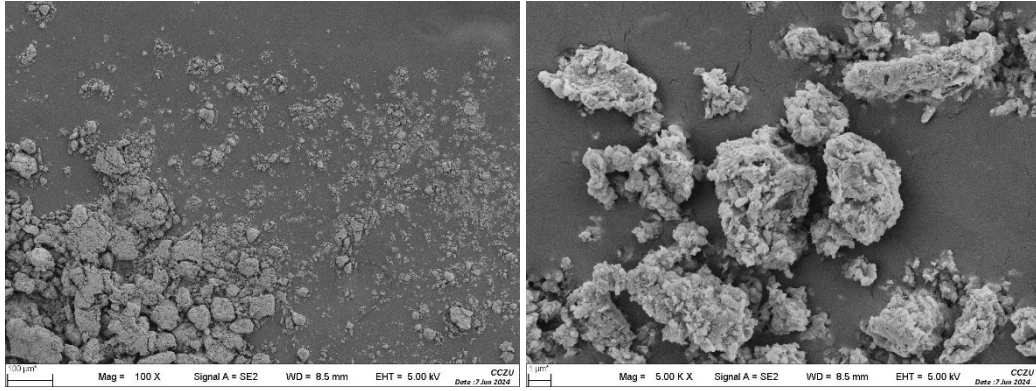

**Fig. S1d.** SEM images of  $\text{Ni}_2\text{Mg}_2\text{Mn-LDO}$  (450).

The thermogravimetric (TG) analysis of  $\text{Ni}_2\text{Mg}_2\text{Mn-LDH}$  and its calcined samples, depicted in Figure S2, outlines three distinct stages of weight loss. The initial weight loss around  $100^\circ\text{C}$  is attributed to the evaporation of surface-adsorbed water. Between  $100^\circ\text{C}$  and  $200^\circ\text{C}$ , the release of interlayer water occurs without the collapse of the hydroxalcalite structure. The third stage, occurring between  $200^\circ\text{C}$  and  $300^\circ\text{C}$ , involves dehydration of hydroxyl groups on the brucite layers and the loss of  $\text{CO}_2$  from the interlayers<sup>[1]</sup>.

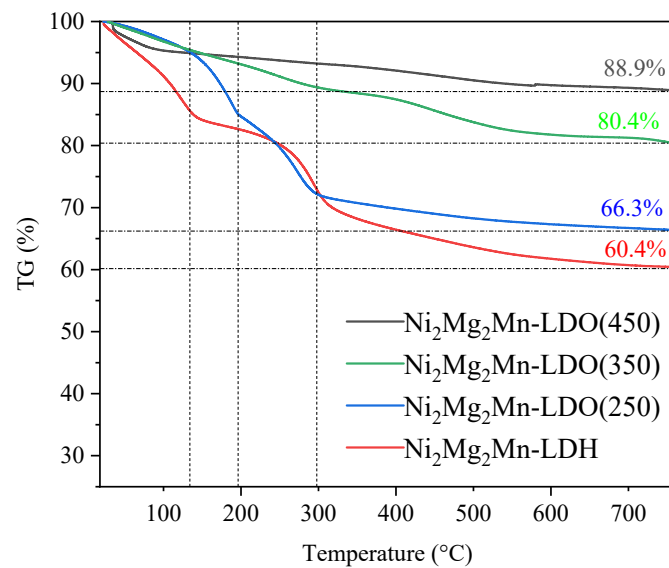

**Fig. S2.** TG thermogram of  $\text{Ni}_2\text{Mg}_2\text{Mn-LDH}$ ,  $\text{Ni}_2\text{Mg}_2\text{Mn-LDO}$  (250),  $\text{Ni}_2\text{Mg}_2\text{Mn-LDO}$  (350) and  $\text{Ni}_2\text{Mg}_2\text{Mn-LDO}$  (450).

Fourier-transform infrared spectroscopy (FTIR) spectra of the four catalyst samples, displayed in Figure S3, confirm that mixed oxides gradually formed during calcination at various temperatures. The  $\text{Ni}_2\text{Mg}_2\text{Mn-LDH}$  spectra feature an absorption band near  $3442\text{ cm}^{-1}$ , corresponding to the hydroxyl stretching vibrations of  $\text{H}_2\text{O}$  molecules. The peak at  $1742\text{ cm}^{-1}$ , likely indicative of interlayer water, diminishes with the dehydration process during hydroxalcalite calcination<sup>[2]</sup>. In the calcined samples, the

presence of hydroxyl groups or water, as indicated by spectral features, is due to the adsorption of atmospheric moisture during analysis. A distinct absorption peak at  $1384\text{ cm}^{-1}$  in the  $\text{Ni}_2\text{Mg}_2\text{Mn-LDH}$  suggests the presence of carbonate anions; its absence in calcined samples indicates complete decarbonation post-calcination.

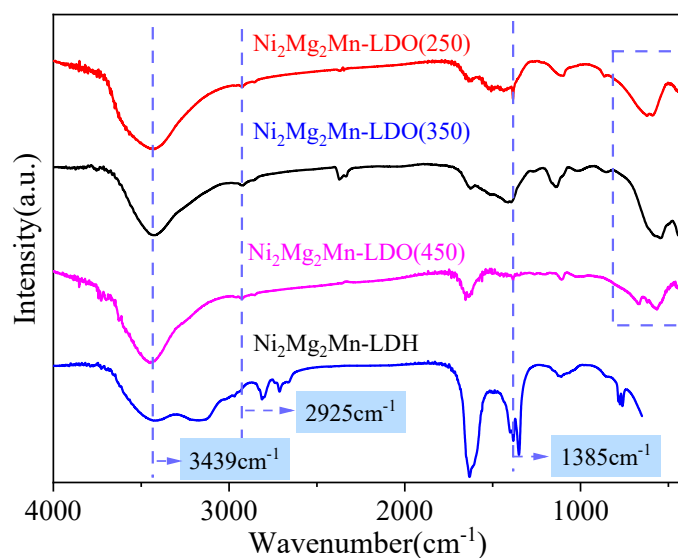

**Fig. S3.** FT-IR spectra of  $\text{Ni}_2\text{Mg}_2\text{Mn-LDH}$  and  $\text{Ni}_2\text{Mg}_2\text{Mn-LDO}$  (350).

Figure S4 displays the physical adsorption and desorption isotherms, as well as the pore size distributions, for the LDH samples, both before and after calcination. Both  $\text{Ni}_2\text{Mg}_2\text{Mn-LDH}$  and its thermally treated counterparts exhibit mesoporous characteristics. Their adsorption and desorption isotherms are classified as type IV isotherms, displaying hysteresis loops in the intermediate section. The hysteresis loop observed in the uncalcined  $\text{Ni}_2\text{Mg}_2\text{Mn-LDH}$  corresponds to the H3-type hysteresis loop, consistent with the characteristics of lamellar granular materials. This finding aligns with the analysis conducted using scanning electron microscopy. The specific surface area, pore volume, and pore size values are provided in Table S1. The calcined hydrotalcites all have a large specific surface area and pore volume, which may give  $\text{Ni}_2\text{Mg}_2\text{Mn-LDO}(350)$  a better catalytic performance for the decomposition of 1,2-diols. The specific catalytic effect depends on the quantity of active species and sites, necessitating confirmation through additional experiments.

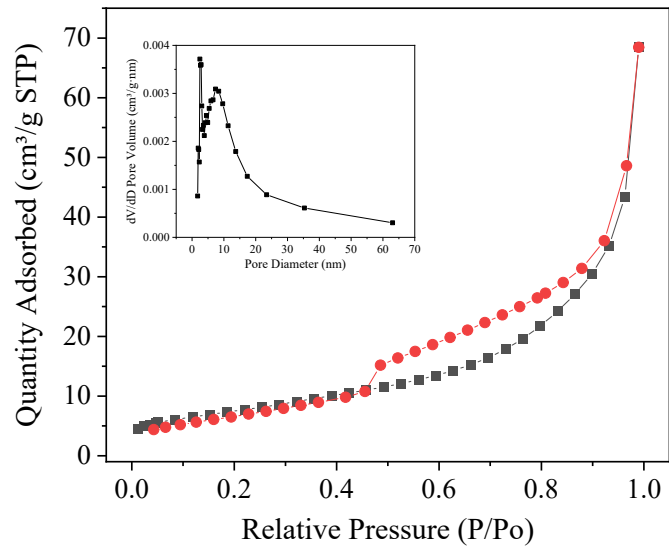

**Fig. S4a.** N<sub>2</sub> adsorption / desorption isotherms of Ni<sub>2</sub>Mg<sub>2</sub>Mn-LDH.

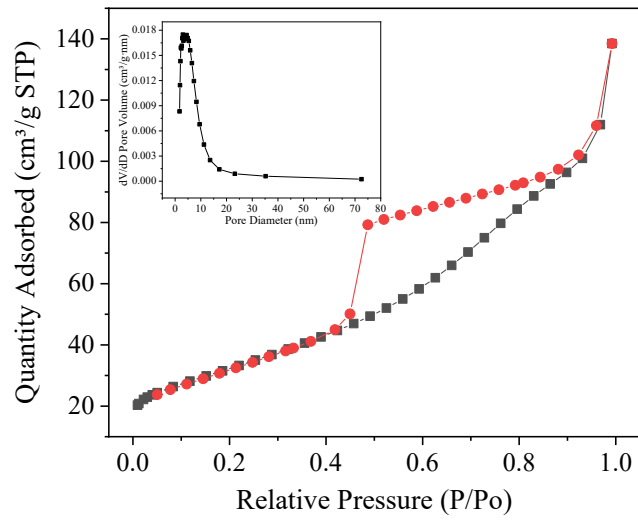

**Fig. S4b.** N<sub>2</sub> adsorption / desorption isotherms of Ni<sub>2</sub>Mg<sub>2</sub>Mn-LDO (250).

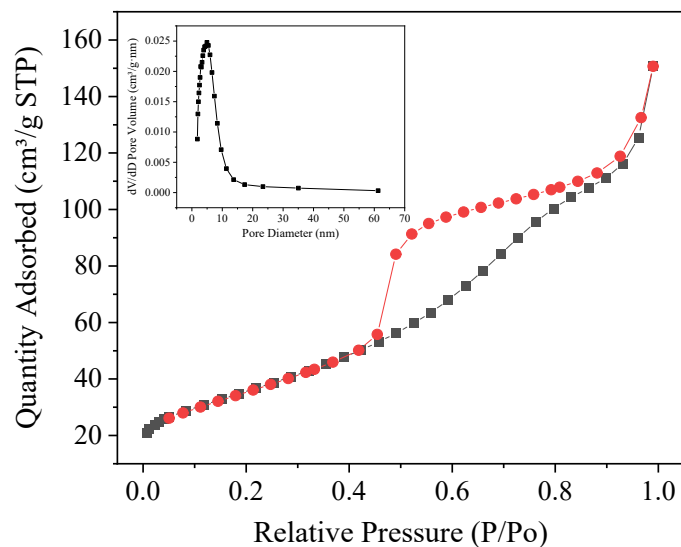

**Fig. S4c.** N<sub>2</sub> adsorption / desorption isotherms of Ni<sub>2</sub>Mg<sub>2</sub>Mn-LDO (350).

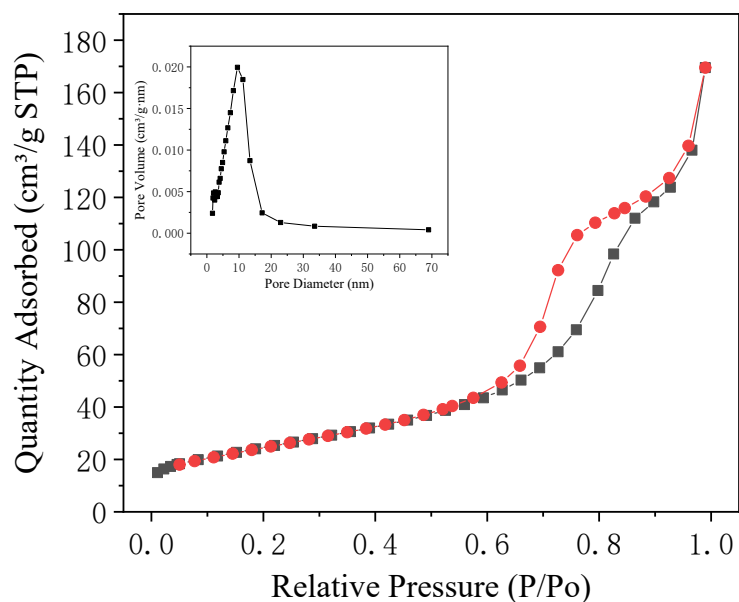

**Fig. S4d.** N<sub>2</sub> adsorption / desorption isotherms of Ni<sub>2</sub>Mg<sub>2</sub>Mn-LDO (450).

**Table S1.** Physico-chemical properties of Ni<sub>2</sub>Mg<sub>2</sub>Mn-LDH and Ni<sub>2</sub>Mg<sub>2</sub>Mn-LDO (350).

| Entries | catalysts                                   | surface area        | pore volume          | Pore diameter |
|---------|---------------------------------------------|---------------------|----------------------|---------------|
|         |                                             | (m <sup>2</sup> /g) | (cm <sup>3</sup> /g) | (nm)          |
| 1       | Ni <sub>2</sub> Mg <sub>2</sub> Mn-LDH      | 27.2869             | 0.105875             | 15.5203       |
| 2       | Ni <sub>2</sub> Mg <sub>2</sub> Mn-LDO(250) | 116.8115            | 0.214194             | 7.3347        |
| 2       | Ni <sub>2</sub> Mg <sub>2</sub> Mn-LDO(350) | 129.9681            | 0.233050             | 7.1725        |
| 4       | Ni <sub>2</sub> Mg <sub>2</sub> Mn-LDO(450) | 88.9210             | 0.262175             | 11.7936       |



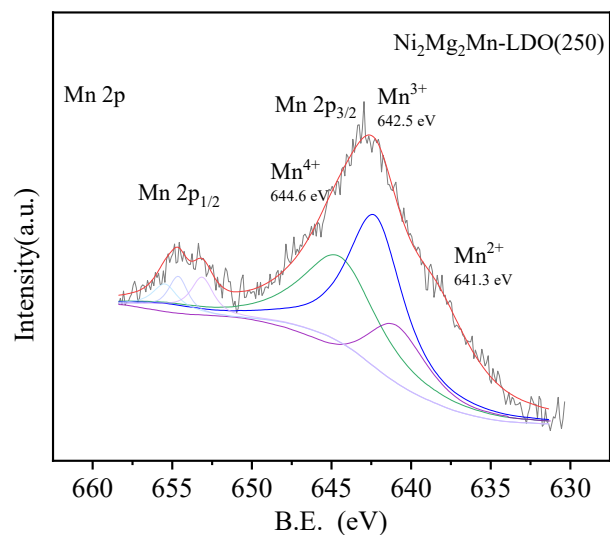

**Fig. S5a.** XPS diffraction patterns of Ni<sub>2</sub>Mg<sub>2</sub>Mn-LDO (250)

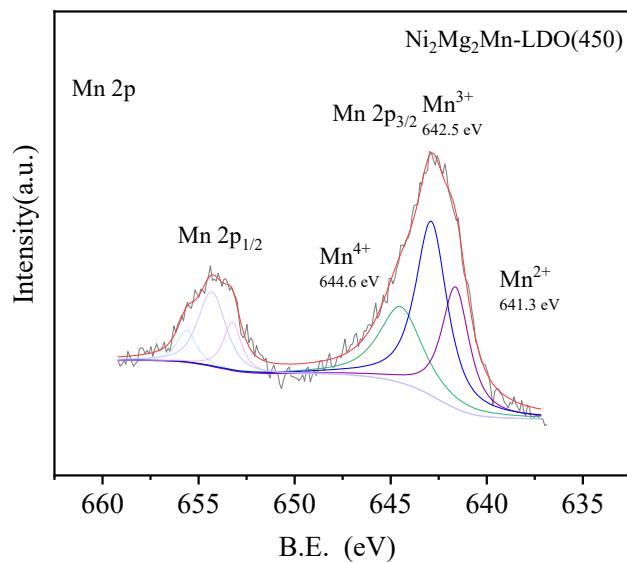

**Fig. S5b.** XPS diffraction patterns of Ni<sub>2</sub>Mg<sub>2</sub>Mn-LDO (450)

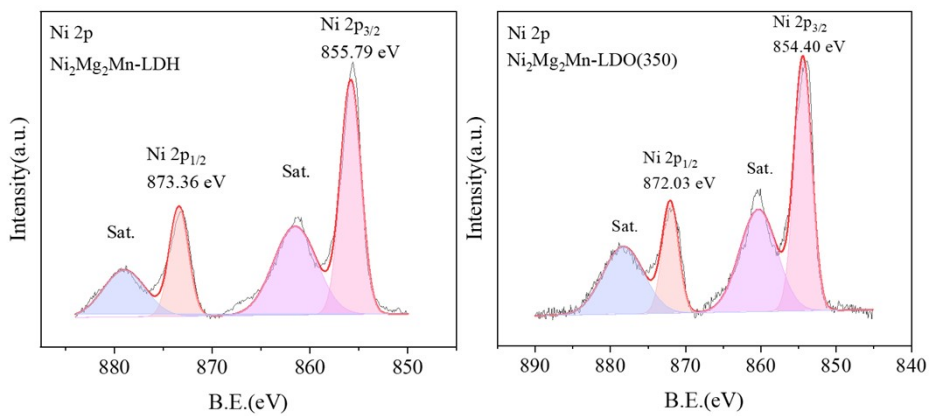

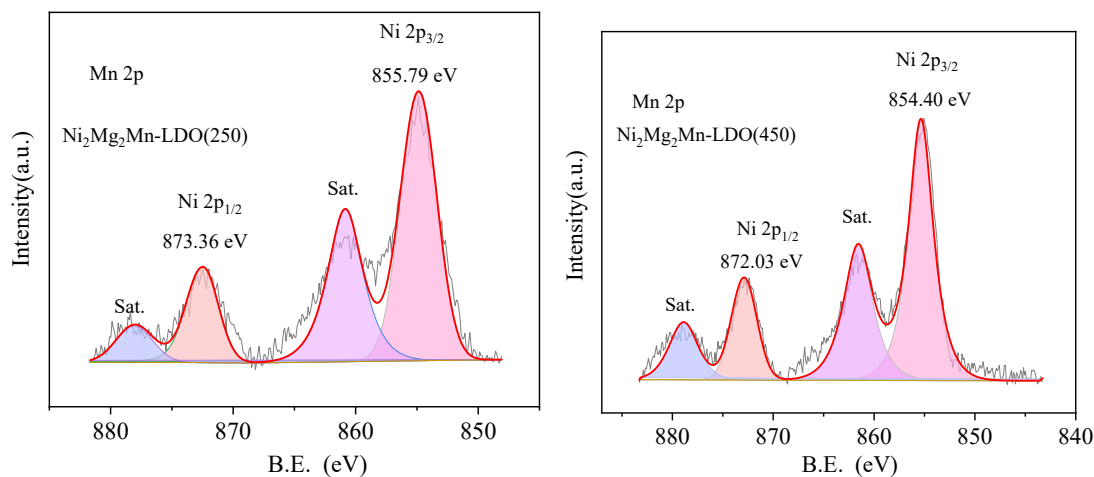

**Fig. S5c.** XPS diffraction patterns of prepared catalysts.

**Table S2.** Optimization of Reaction Conditions.

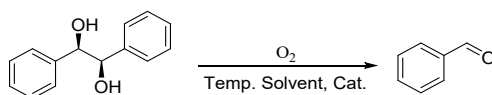

| Entry           |                  | Catalyst                                    | Conv. /% | Sel. /% |
|-----------------|------------------|---------------------------------------------|----------|---------|
| 1               | ethanol          | Ni <sub>2</sub> Mg <sub>2</sub> Mn-LDO(250) | 71       | >99     |
| 2               | ethanol          | Ni <sub>2</sub> Mg <sub>2</sub> Mn-LDO(350) | 99       | >99     |
| 3               | ethanol          | Ni <sub>2</sub> Mg <sub>2</sub> Mn-LDO(450) | 54       | >99     |
| 4               | ethanol          | Ni <sub>2</sub> Mg <sub>2</sub> Mn-LDH      | 8        | >99     |
| 5               | H <sub>2</sub> O | Ni <sub>2</sub> Mg <sub>2</sub> Mn-LDO(350) | trace    | -       |
| 6               | methanol         | Ni <sub>2</sub> Mg <sub>2</sub> Mn-LDO(350) | 28       | >99     |
| 7               | ethanol          | -                                           | trace    | -       |
| 8 <sup>a</sup>  | ethanol          | Ni <sub>2</sub> Mg <sub>2</sub> Mn-LDO(350) | 6        | >99     |
| 9 <sup>b</sup>  | ethanol          | Ni <sub>2</sub> Mg <sub>2</sub> Mn-LDO(350) | 55       | >99     |
| 10              | ethanol          | activated MnO <sub>2</sub>                  | 36       | >99     |
| 11              | ethanol          | Ni <sub>2</sub> Mn-LDO(350)                 | 16       | >99     |
| 12              | ethanol          | Ni <sub>2</sub> MgAl-LDO(350)               | trace    | -       |
| 13 <sup>c</sup> | ethanol          | Ni <sub>2</sub> Mg <sub>2</sub> Mn-LDO(350) | 32       | >99     |
| 14 <sup>d</sup> | ethanol          | Ni <sub>2</sub> Mg <sub>2</sub> Mn-LDO(350) | 26       | >99     |
| 15 <sup>e</sup> | ethanol          | Ni <sub>2</sub> Mg <sub>2</sub> Mn-LDO(350) | 11       | >99     |

Reaction conditions: *meso*-hydrobenzoin 0.25 mmol, catalyst 50 mg, ethanol 3 mL, 80 °C, 45 min, O<sub>2</sub> 5 mL/min. <sup>a</sup>

N<sub>2</sub>, <sup>b</sup> air. <sup>c</sup> TEMPO. <sup>d</sup> BHT. <sup>e</sup> 1,4-Benzoquinone.

Reaction conditions were first investigated and presented in the supporting information in Table S2. Ethanol, a green solvent, was selected as the best solvent (Table S2, entry 2, 4, 5). A 99% conversion with complete selectivity toward benzaldehyde was obtained at 80 °C in ethanol within 45 min under O<sub>2</sub>. Only Ni<sub>2</sub>Mg<sub>2</sub>Mn-LDO (350) showed satisfactory catalytic activity among the calcined samples and the

Ni<sub>2</sub>Mg<sub>2</sub>Mn-LDH precursor. Only 6% conversion can be obtained under N<sub>2</sub>, confirming oxygen is essential for the reaction (Table S2, entry 8). The slight transformation under N<sub>2</sub> might be attributed to the absorbed oxygen on the surface of the catalyst materials. Mn and the alkalinity of the material are identified as pivotal factors influencing the reaction (Table S2, entry 10—12). The high catalytic activity of Ni<sub>2</sub>Mg<sub>2</sub>Mn-LDO (350) may be attributable to its high surface concentration of Mn<sup>3+</sup> and basic sites, based on the result of the characters of the prepared materials.

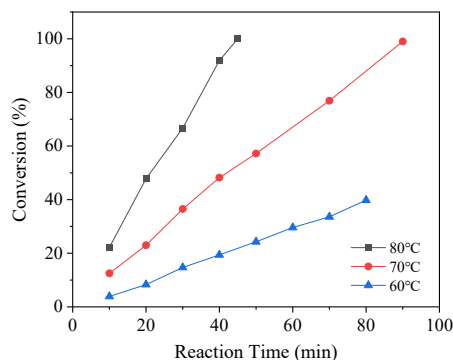

**Fig. S6.** Effect of reaction temperature and time.

The catalytic performance of the Ni<sub>2</sub>Mg<sub>2</sub>Mn-LDO(350) catalyst was investigated at 60°C, 70°C and 80°C, separately. It can be seen from the above figure that the conversion rate of hydrogen amine increases with the increase of temperature, and it can be roughly seen that the conversion rate increases exponentially with a 10°C rise in temperature. When the reaction temperature is 70°C, the reaction is complete within 90 min; and when the reaction temperature is 80°C, the reaction conversion can be completed within 45 minutes. Therefore, Ni<sub>2</sub>Mg<sub>2</sub>Mn-LDO(350) catalyzed the optimal reaction temperature for the oxidative decomposition of hydrogen amines at 80 °C and the optimal reaction time was 45 min.

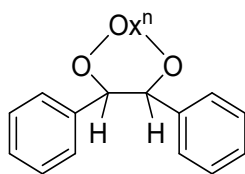

**Scheme S1**

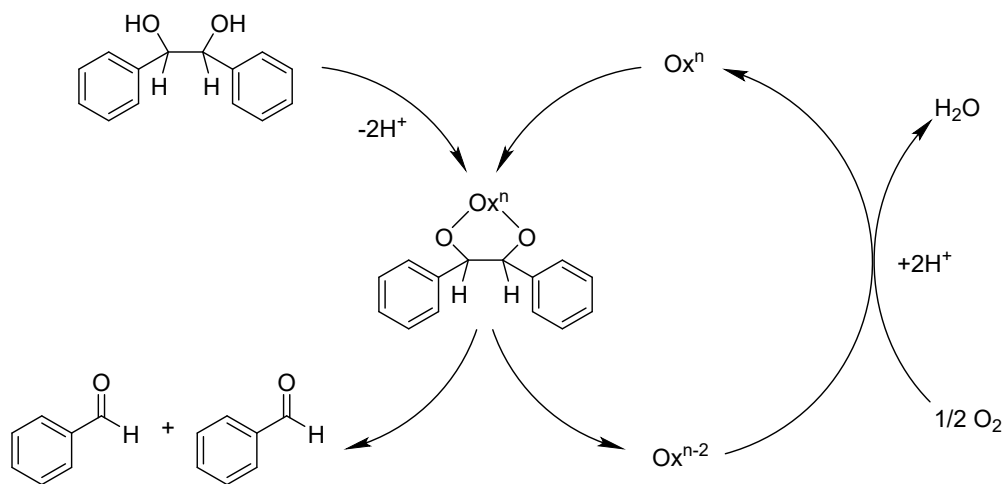

**Scheme S2.** Hypotheses regarding the mechanism involving cyclic intermediates.

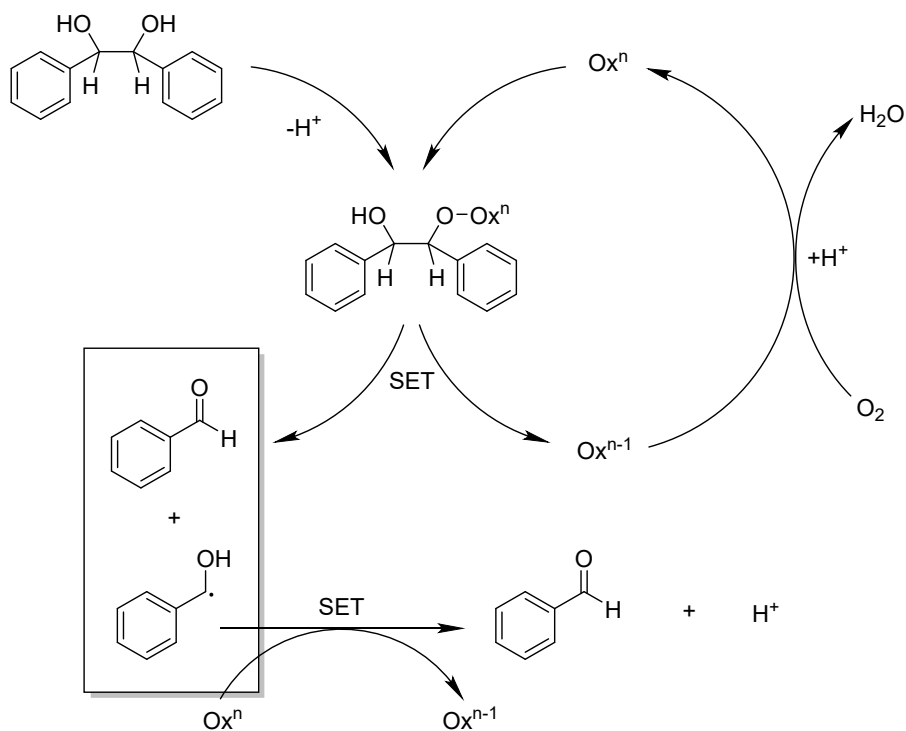

**Scheme S3.** Hypothesis regarding the mechanism of single-electron transfer.

## Kinetic experiments

### Out-diffusion exclusion

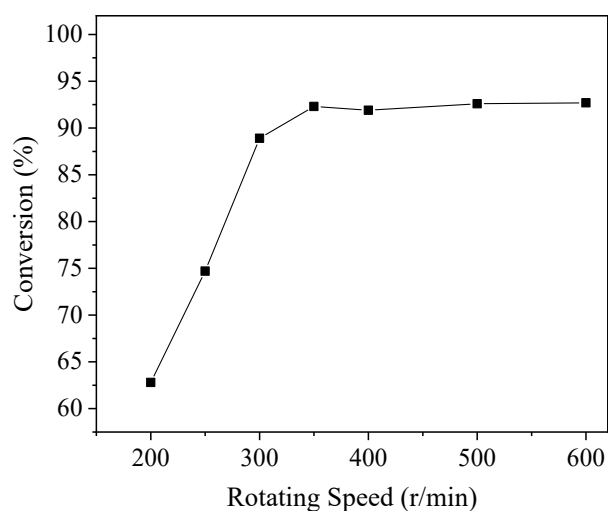

**Fig. S7.** The effect of rotational speed on the conversion of the oxidative decomposition of hydrogen amines.

The external diffusion effect was investigated by adjusting the rotational speed. And the results depicted in Fig. S6 show that external diffusion could be neglected when the rotational speed was higher than 350 /min in the oxidative decomposition of hydrogen amines. The influence of internal diffusion was eliminated through calculation.

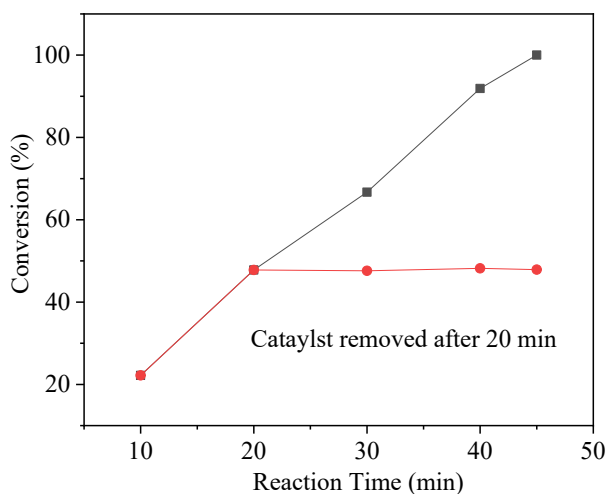

**Fig. S8.** The hot-filtration experiment.

Reaction conditions: (*R,R*)-hydrobenzoin 0.25 mmol, ethanol 3 mL, Ni<sub>2</sub>Mg<sub>2</sub>Mn-LDO(350) 50 mg, 80 °C, O<sub>2</sub> 5 mL/min.

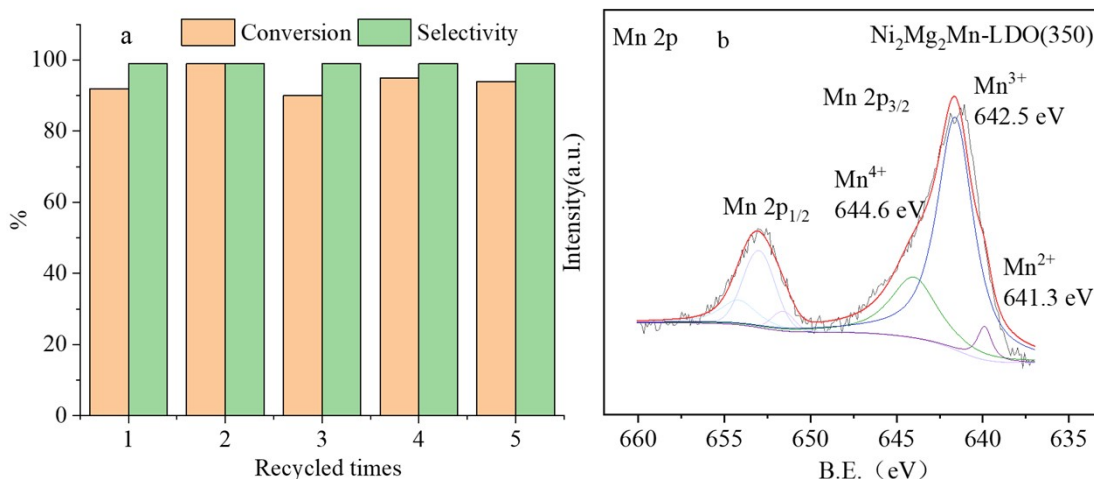

**Fig. S9a.** The recycled results of Ni<sub>2</sub>Mg<sub>2</sub>Mn-LDO(350) catalyst.

Reaction conditions: (*R,R*)-hydrobenzoin 0.25 mmol, ethanol 3 mL, Ni<sub>2</sub>Mg<sub>2</sub>Mn-LDO(350) 50 mg, 80 °C, O<sub>2</sub> 5 mL/min.

**Fig. S9b.** XPS diffraction patterns of recycled Ni<sub>2</sub>Mg<sub>2</sub>Mn-LDO(350)

#### Analytical Data

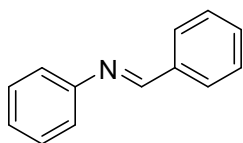

#### (E)-N,1-diphenylmethanimine

Pale yellow solid; <sup>1</sup>H NMR (400 MHz, Chloroform-*d*) δ 8.44 (s, 1H), 7.94 – 7.84 (m, 2H), 7.46 (dd, *J* = 5.1, 1.9 Hz, 3H), 7.41 – 7.30 (m, 2H), 7.22 (tt, *J* = 8.3, 1.2 Hz, 3H). <sup>13</sup>C NMR (101 MHz, Chloroform-*d*) δ 160.4, 152.0, 136.1, 131.3, 129.1, 128.8, 128.7, 125.9, 120.8. HRMS (ESI) Calcd. for C<sub>11</sub>H<sub>12</sub>O<sub>2</sub> [M+H]<sup>+</sup> 182.0964, found 182.0959.

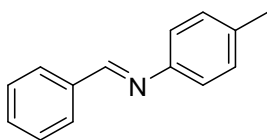

#### Phenyl-N-(p-tolyl)methanimine

Yellow oil; <sup>1</sup>H NMR (300 MHz, Chloroform-*d*) δ 8.34 (s, 1H), 7.83 – 7.74 (m, 2H), 7.39 – 7.28 (m, 3H), 7.13 – 6.98 (m, 4H), 2.25 (s, 3H). <sup>13</sup>C NMR (75 MHz, Chloroform-*d*) δ 159.5, 149.3, 136.2, 135.7, 131.1, 129.7, 128.6, 128.6, 120.7, 20.9. HRMS (ESI) Calcd for C<sub>11</sub>H<sub>12</sub>O<sub>2</sub> [M+H]<sup>+</sup> 196.1121, found 196.1118.

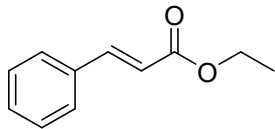

Ethyl cinnamate

$^1\text{H NMR}$  (400 MHz, Chloroform-*d*)  $\delta$  7.69 (d,  $J = 16.0$  Hz, 1H), 7.55 – 7.50 (m, 2H), 7.41 – 7.33 (m, 3H), 6.45 (d,  $J = 16.0$  Hz, 1H), 4.17 (t,  $J = 6.7$  Hz, 2H), 1.78 – 1.69 (m, 2H), 0.99 (t,  $J = 7.4$  Hz, 3H).  $^{13}\text{C NMR}$  (101 MHz, Chloroform-*d*)  $\delta$  167.1, 144.5, 134.4, 130.2, 128.8, 128.0, 118.2, 66.1, 22.0, 10.4. HRMS (ESI) Calcd. for  $\text{C}_{11}\text{H}_{12}\text{O}_2$   $[\text{M}+\text{H}]^+$  177.0910, found 177.0909.

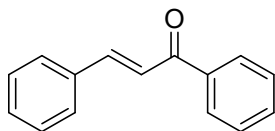

(E)-chalcone

Light Yellow solid;  $^1\text{H NMR}$  (400 MHz, Chloroform-*d*)  $\delta$  8.08 – 7.97 (m, 2H), 7.81 (d,  $J = 15.7$  Hz, 1H), 7.65 – 7.62 (m, 2H), 7.61 – 7.46 (m, 4H), 7.45 – 7.37 (m, 3H).  $^{13}\text{C NMR}$  (101 MHz, Chloroform-*d*)  $\delta$  190.5, 144.8, 138.1, 134.8, 132.7, 130.5, 128.9, 128.6, 128.4, 128.4, 122.0. HRMS (ESI) Calcd. for  $\text{C}_{11}\text{H}_{12}\text{O}_2$   $[\text{M}+\text{H}]^+$  209.0961, found 209.0956.

## NMR Spectra

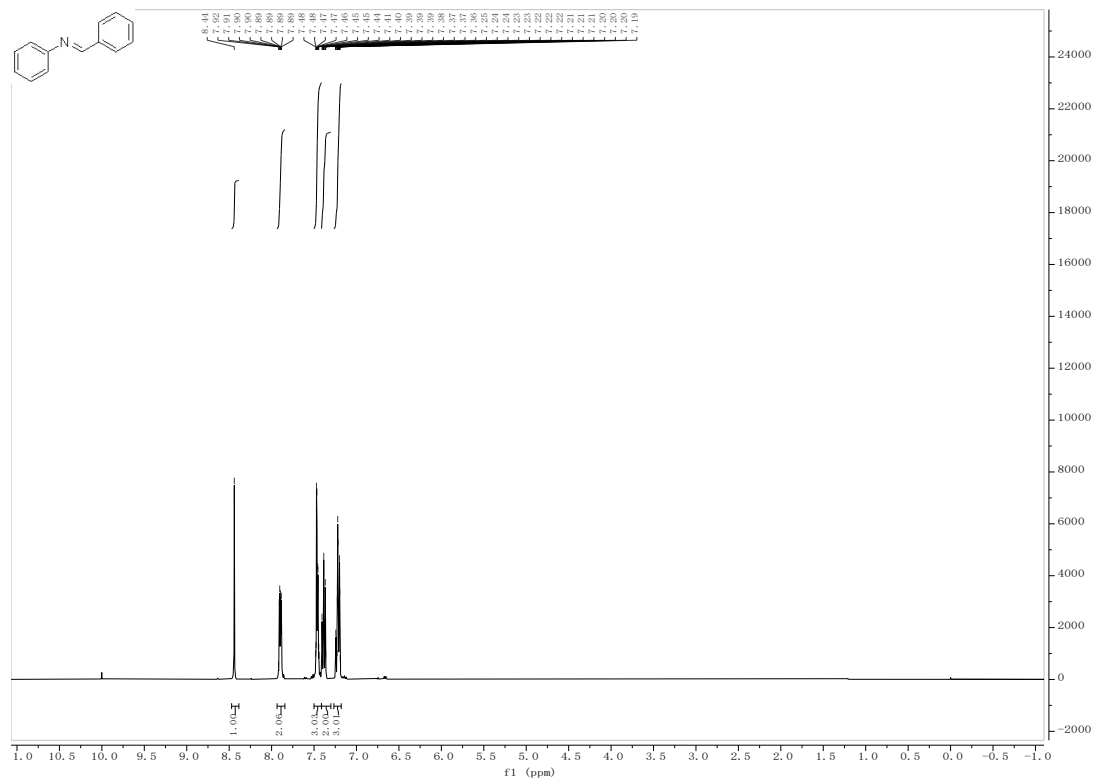

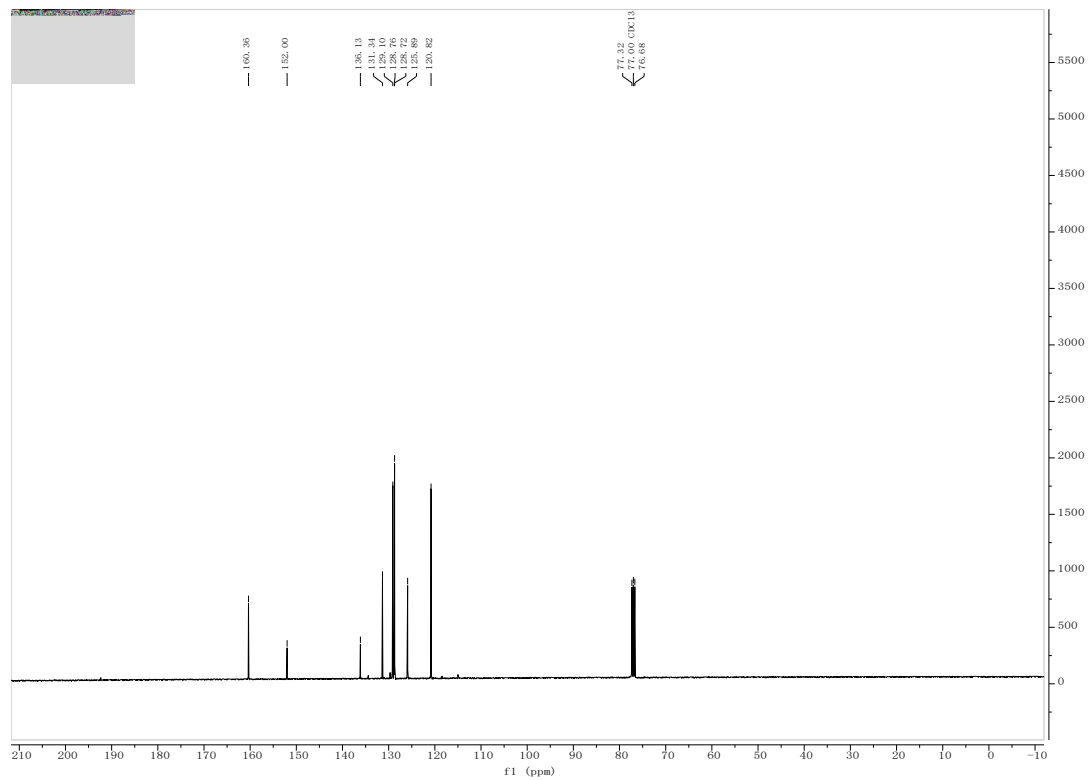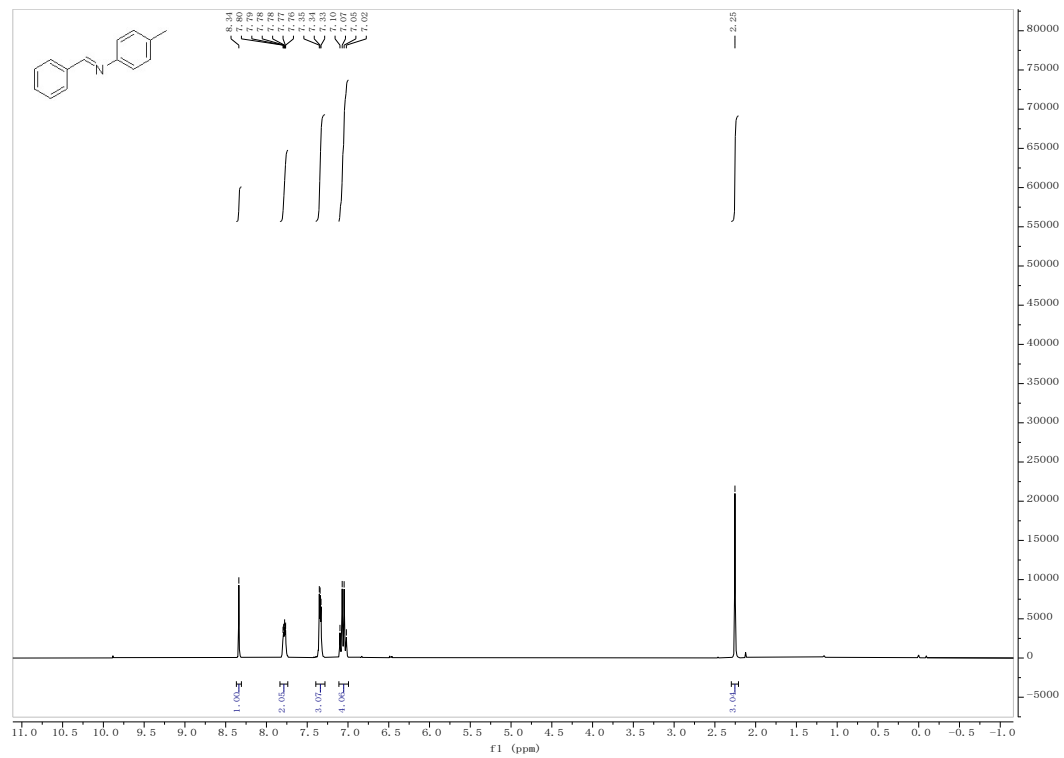



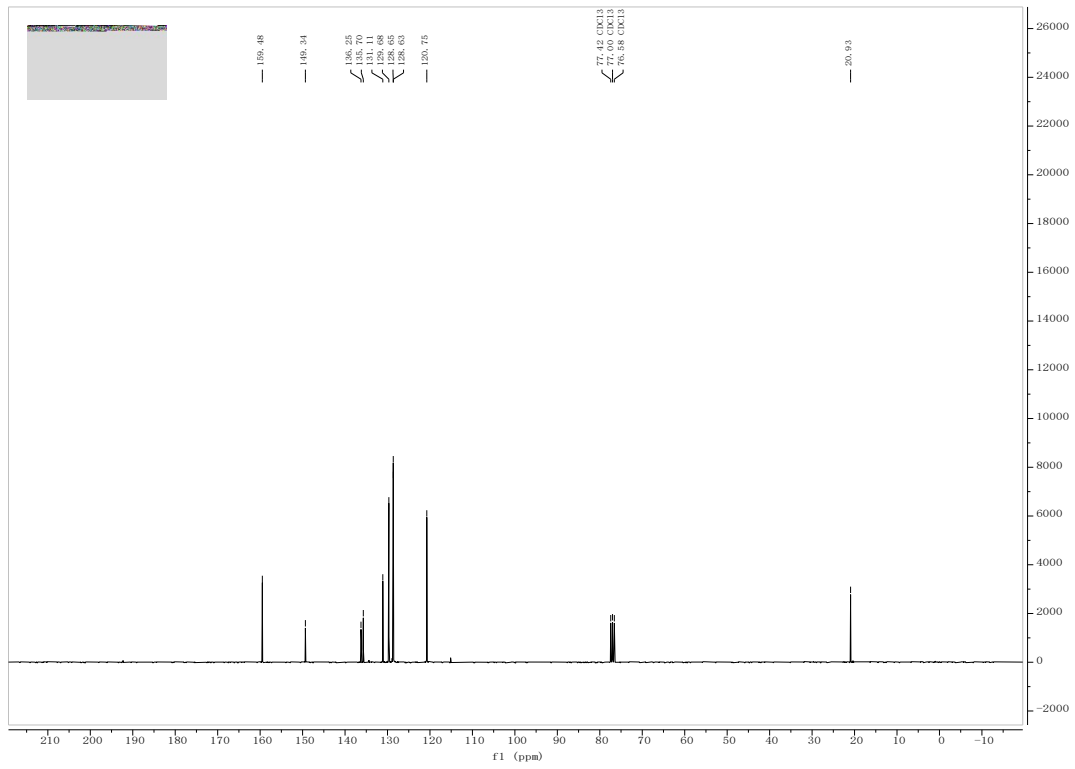

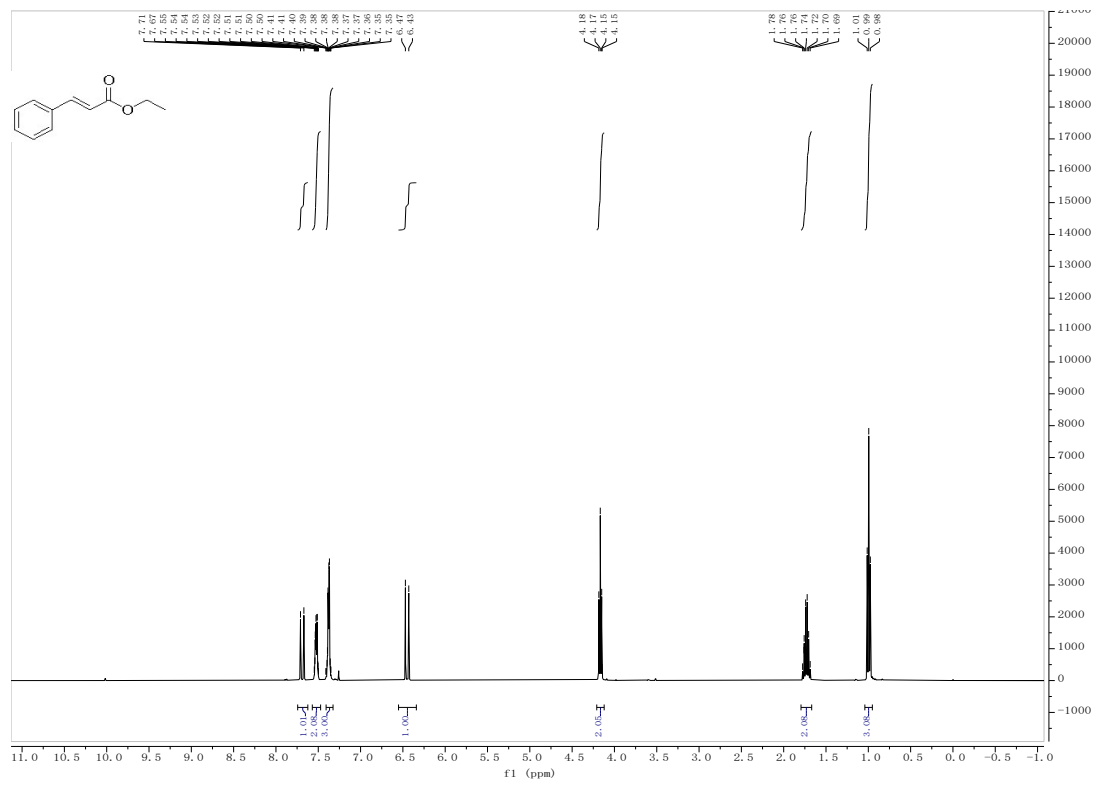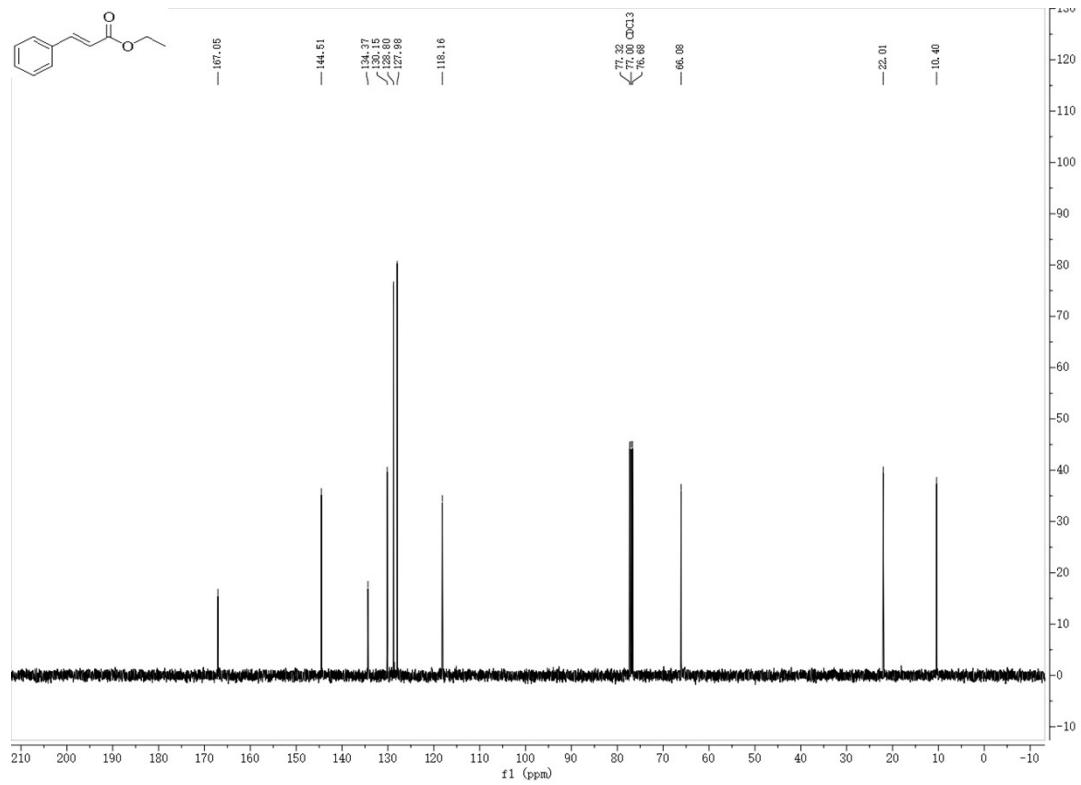

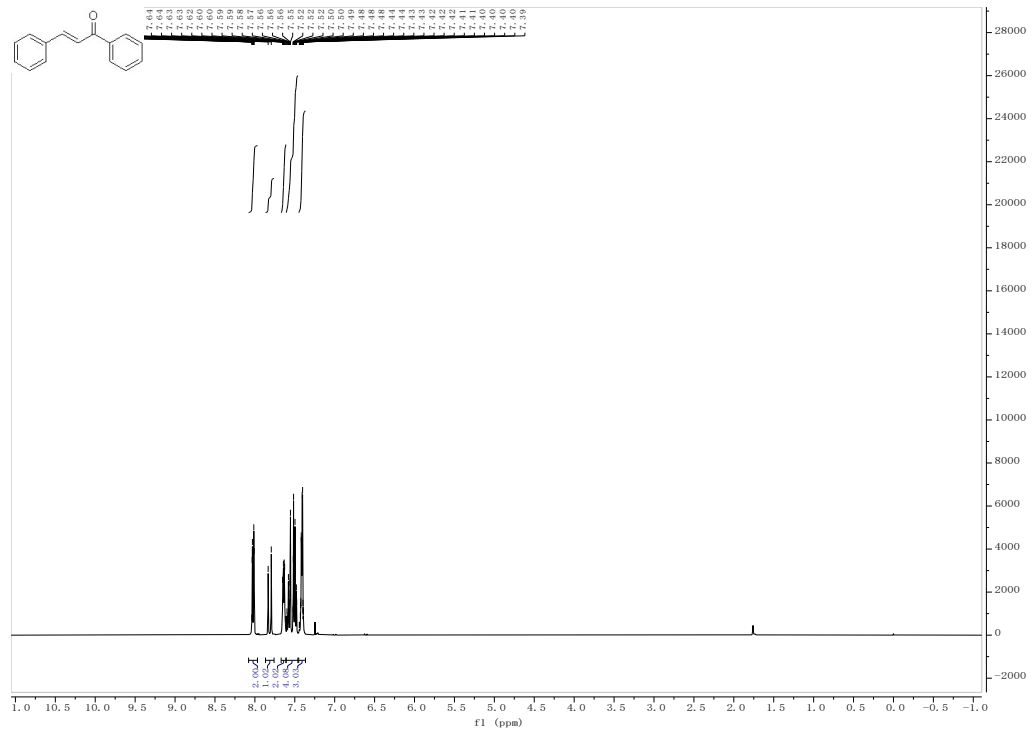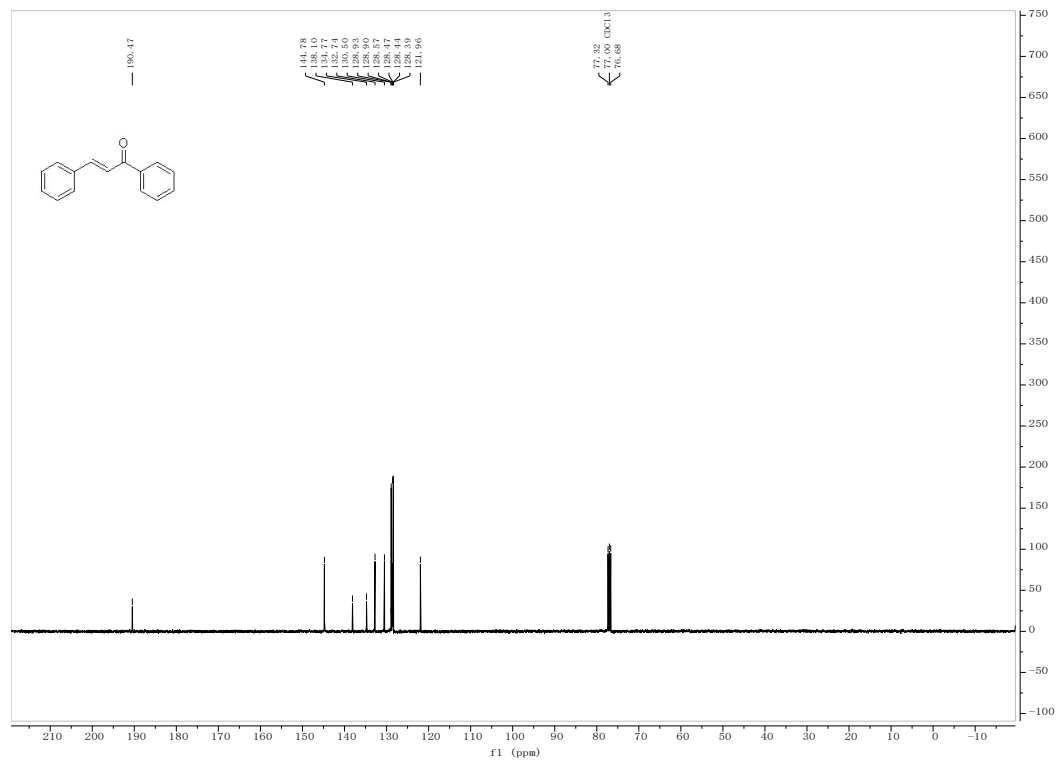

## Reference

- [1] J. Pérez-Ramírez, G. Mul, F. Kapteijn, J.A. Moulijn, In situ investigation of the thermal decomposition of Co–Al hydrotalcite in different atmospheres, *J. Mater. Chem.*, 11 (2001) 821-830.
- [2] Pérez-Ramírez J, Mul G, Kapteijn F, *et al.* In situ investigation of the thermal decomposition of Co-Al hydrotalcite in different atmospheres [J]. *Journal of Materials Chemistry*, **2001**, 11(3): 821-830.
